# Supplementary material for: Active surveillance for prostate cancer
Source: PubMed Central journal article supplement — Transl Androl Urol. 2021 Jun;10(6):2809–19. doi: 10.21037/tau-20-1370 (PMC8261451; doi:10.21037/tau-20-1370), 2021-06
Supplement: tau-10-06-2809-supplementary.pdf [file tau-10-06-2809-supplementary.pdf]

| Cohort descriptions and outcomes |                    |      |       |               |             |                                  |                                    |                    |                                        |                                                         |                                              |                                                             |                                                                                                                        |                                                                                                                     |                                                                                                        |
|----------------------------------|--------------------|------|-------|---------------|-------------|----------------------------------|------------------------------------|--------------------|----------------------------------------|---------------------------------------------------------|----------------------------------------------|-------------------------------------------------------------|------------------------------------------------------------------------------------------------------------------------|---------------------------------------------------------------------------------------------------------------------|--------------------------------------------------------------------------------------------------------|
| Cohort                           | Cohort description |      |       |               |             |                                  |                                    | Inclusion criteria |                                        |                                                         |                                              | Outcomes                                                    |                                                                                                                        |                                                                                                                     |                                                                                                        |
|                                  | Reference          | Year | N     | Country       | Study years | Md patient age (years)           | Md PSA-level (ng/mL)               | Max c T stage      | Max PSA-level (ng/mL)                  | Grade group                                             | Max No. Pos. Cores                           | Md follow-up                                                | Risk of prostate cancer metastasis                                                                                     | Risk of prostate cancer death                                                                                       | Risk of switching to active treatment                                                                  |
| MSK                              | (14)               | 2020 | 2,664 | USA           | 2000–2017   | 62                               | 5                                  | T2C                | N/A                                    | GG1                                                     | No restrictions                              | 4.3 years                                                   | 0.1% (95% CI: 0.03–0.4) at 5 years<br>0.6% (95% CI: 0.2–2.0) at 10 years<br>1.5% (95% CI: 0.4–5.2) at 15 years         | 1/2,664 died<br>0% (95% CI: 0–1) at 10 years                                                                        | 24% (95% CI: 22–26) at 5 years;<br>36% (95% CI: 32–39) at 10 years;<br>42% (95% CI: 36–49) at 15 years |
| MSK                              | (13)               | 2020 | 219   | USA           | 2000–2017   | 67                               | 5                                  | T3A                | N/A                                    | GG2                                                     | 3                                            | 3.1 years                                                   | No distant metastasis, 2 men with lymph node metastatic disease                                                        | No deaths                                                                                                           | 39% (95% CI: 30–48) at 5 years;<br>51% (95% CI: 40–63) at 10 years                                     |
| Johns Hopkins                    | (12)               | 2020 | 1,818 | USA           | 1995–2018   | 66 very low risk;<br>67 low risk | 4.6 very low risk;<br>5.9 low risk | T2A                | 10                                     | GG1                                                     | 2                                            | 5.0 years                                                   | 1 additional man with metastatic disease<br>0.1% (95% CI: 0.04–0.6) at 10 years<br>0.1% (95% CI: 0.04–0.6) at 15 years | 4/1818 died<br>0.1% (95% CI: 0.01–0.4) at 10 years<br>0.1% (95% CI: 0.01–0.4) at 15 years                           | 36% (95% CI: 34–38) at 5 years;<br>48% (95% CI: 45–51) at 10 years;<br>52% (95% CI: 49–55) at 15 years |
| UCSF                             | (15)               | 2019 | 1,916 | USA           | 1994–2017   | 62                               | 5.5                                | T2                 | N/A                                    | GG1 (86.6%) GG2, 1 core (6.9%);<br>GG2, 2+ cores (6.5%) | No restrictions                              | 5.5 years                                                   | 4 men with bone metastatic disease                                                                                     | 1/1,916 died                                                                                                        | 23.4% at 5.5 years                                                                                     |
| PRIAS                            | (18)               | 2016 | 5,302 | Multi-country | 2006–2016   | 66                               | 5.7                                | T2C                | 10                                     | 2006: GG1; 2012: GG1 (99%) GG2 (1%)                     | 2006: 2 positive cores 2015: no restrictions | 622 were followed >5 years,<br>107 were followed >7.5 years | 8 men with metastatic disease                                                                                          | 1/5,302 died                                                                                                        | 52% at 5 years; 73% at 10 years                                                                        |
| Miami                            | (25)               | 2010 | 230   | USA           | 1992–2009   | 64                               | 4.76                               | T2C                | 10                                     | GG1                                                     | 2                                            | 2.7 years                                                   | Not reported                                                                                                           | No deaths                                                                                                           | 14% at 2.8 years                                                                                       |
| Royal Marsden                    | (24)               | 2013 | 471   | UK            | 2002–2011   | 66                               | 6.4                                | T2B                | 15                                     | GG1 or GG2 (if >65 years)                               | <50% of total biopsy cores                   | 5.7 years                                                   | 2 men with metastatic disease                                                                                          | 2/471 died                                                                                                          | 11% (95% CI: 8–14) at 2 years;<br>30% (95% CI: 25–35) at 5 years                                       |
| ProtecT                          | (17)               | 2016 | 545   | UK            | 1999–2009   | 62                               | 4.6                                | T2                 | 20                                     | GG1 (77%); GG2–3 (20%); GG4–5 (2%)                      | N/A                                          | 10 years                                                    | 33 men with metastatic disease                                                                                         | 8/545 died (3 with GG1, 5 with GG2+)<br>0.6% (95% CI: 0.2%–1.7%) at 5 years<br>1.2% (95% CI: 0.5%–2.6%) at 10 years | 54.8% (95% CI: 50.4–59.3%) at 10 years                                                                 |
| Toronto                          | (22)               | 2015 | 993   | Canada        | 1995–2013   | 68                               |                                    | T2C                | 20                                     | 1995: GG1; 2000: GG1 (84%) GG2 (13%)                    |                                              | 6.4 years                                                   | 28 men with metastatic disease<br>2.8% at 15 years                                                                     | 15/993 died<br>1.9% at 10 years<br>5.7% at 15 years                                                                 | 24.3% at 5 years; 36.5% at 10 years;<br>45% at 15 years; 45% at 20 years                               |
| Copenhagen                       | (21)               | 2015 | 317   | Denmark       | 2002–2013   | 65                               | 6.6                                | T2A                | 10                                     | GG1                                                     | 3                                            | 3.7 years                                                   | Not reported                                                                                                           | No deaths                                                                                                           | 39.5% at 5 years                                                                                       |
| St Vincents                      | (23)               | 2015 | 650   | Australia     | 1998–2012   | 63                               | 6.2                                | T2B                | 10                                     | GG1                                                     | <20% of total biopsy cores                   | 4.6 years                                                   | 0% at 7.5 years                                                                                                        | 0% at 7.5 years                                                                                                     | 43% at 5 years; 55% at 10 years;<br>58% at 15 years                                                    |
| Goteborg                         | (19)               | 2016 | 474   | Sweden        | 1995–2014   | 66                               |                                    | T2C                | <10 low risk;<br><20 intermediate risk | GG1 or GG2                                              |                                              | 8.0 years                                                   | 1.0% (95% CI: 0–4) at 10 years<br>7.0% (95% CI: 3–16) at 15 years                                                      | 6/474 died<br>0.5% (95% CI: 0–3) at 10 years<br>4.0% (95% CI: 2–10) at 15 years                                     | 53% (95% CI: 47–59) at 10 years;<br>66% (95% CI: 57–75) at 15 years                                    |
| Canary PASS                      | (20)               | 2016 | 905   | USA           | 2008–2013   | 63                               |                                    | T2C                | 20                                     | GG1 or GG2                                              |                                              | 2.3 years                                                   | No metastasis                                                                                                          | No deaths                                                                                                           | 12% at 2 years; 19% at 2.3 years;<br>29% at 5 years; 50% at 10 years                                   |
| Milan                            | (16)               | 2017 | 818   | Italy         | 2005–2016   | 66                               | 5.7                                | T2A                | 10                                     | GG1                                                     | <25% of total biopsy cores                   | 4.9 years                                                   | No metastasis                                                                                                          | No deaths                                                                                                           | 29% (95% CI: 27–31) at 2 years;<br>50% (95% CI: 48–52) at 5 years                                      |
